# Supplementary material for: Characterization of APOBEC3 variation in a population of HIV-1 infected individuals in northern South Africa
Source: PubMed Central journal article supplement (PMC6339282; doi:10.1186/s12881-018-0740-4), 2019-01-19
Supplement: 12881_2018_740_MOESM2_ESM.pdf [file 12881_2018_740_MOESM2_ESM.pdf]

Table S2

**Apobec 3D - LD Calculations  
1000G- All Groups**

| RS_number          | <b>R97C</b><br><b>75858538</b> | <b>T238A</b><br><b>201709403</b> | <b>R248K</b><br><b>61748819</b> | T316T<br>184448269   |
|--------------------|--------------------------------|----------------------------------|---------------------------------|----------------------|
|                    | <b>D'</b>                      | <b>D'</b>                        | <b>D'</b>                       | <b>D'</b>            |
| <b>rs75858538</b>  | 1                              | 1                                | 1                               | 1                    |
| <b>rs201709403</b> | 1                              | 1                                | 1                               | 1                    |
| <b>rs61748819</b>  | 1                              | 1                                | 1                               | 1                    |
| rs184448269        | 1                              | 1                                | 1                               | 1                    |
|                    | <b>R<sup>2</sup></b>           | <b>R<sup>2</sup></b>             | <b>R<sup>2</sup></b>            | <b>R<sup>2</sup></b> |
| <b>rs75858538</b>  | 1                              | 0                                | 0                               | 0                    |
| <b>rs201709403</b> | 0                              | 1                                | 0                               | 0                    |
| <b>rs61748819</b>  | 0                              | 0                                | 1                               | 0.122                |
| rs184448269        | 0                              | 0                                | 0.122                           | 1                    |

**Apobec 3D - LD Calculations  
1000G- AFR Group**

| RS_number          | <b>R97C</b><br><b>75858538</b> | <b>T238A</b><br><b>201709403</b> | <b>R248K</b><br><b>61748819</b> | T316T<br>184448269   |
|--------------------|--------------------------------|----------------------------------|---------------------------------|----------------------|
|                    | <b>D'</b>                      | <b>D'</b>                        | <b>D'</b>                       | <b>D'</b>            |
| <b>rs75858538</b>  | 1                              | 1                                | 1                               | 1                    |
| <b>rs201709403</b> | 1                              | 1                                | 1                               | 1                    |
| <b>rs61748819</b>  | 1                              | 1                                | 1                               | 1                    |
| rs184448269        | 1                              | 1                                | 1                               | 1                    |
|                    | <b>R<sup>2</sup></b>           | <b>R<sup>2</sup></b>             | <b>R<sup>2</sup></b>            | <b>R<sup>2</sup></b> |
| <b>rs75858538</b>  | 1                              | 0                                | 0.004                           | 0                    |
| <b>rs201709403</b> | 0                              | 1                                | 0                               | 0                    |
| <b>rs61748819</b>  | 0.004                          | 0                                | 1                               | 0.099                |
| rs184448269        | 0                              | 0                                | 0.099                           | 1                    |

The following RS numbers were not found in dbSNP 142: rs772893975, rs61999342, rs769426665  
Nonsynonymous SNPs are indicated in **BOLD** font.
