# Supplementary material for: Characterization of APOBEC3 variation in a population of HIV-1 infected individuals in northern South Africa
Source: PubMed Central journal article supplement (PMC6339282; doi:10.1186/s12881-018-0740-4), 2019-01-19
Supplement: 12881_2018_740_MOESM5_ESM.pdf [file 12881_2018_740_MOESM5_ESM.pdf]

Table S5

**Apobec 3H - LD Calculations  
1000G- All Groups**

| RS_number          | <b>N15A</b><br><b>140936762</b> | <b>R18K</b><br><b>139293</b> | T43T<br>139294       | <b>G105R</b><br><b>139297</b> | <b>K121E</b><br><b>139298</b> | <b>K140E</b><br><b>139300</b> | <b>E178D</b><br><b>139302</b> |
|--------------------|---------------------------------|------------------------------|----------------------|-------------------------------|-------------------------------|-------------------------------|-------------------------------|
|                    | D'                              | D'                           | D'                   | D'                            | D'                            | D'                            | D'                            |
| <b>rs140936762</b> | 1                               | 1                            | 0.995                | 0.962                         | 0.961                         | NA                            | 0.922                         |
| <b>rs139293</b>    | 1                               | 1                            | 0.992                | 0.952                         | 0.952                         | NA                            | 0.931                         |
| rs139294           | 0.995                           | 0.992                        | 1                    | 0.973                         | 0.973                         | NA                            | 0.934                         |
| <b>rs139297</b>    | 0.962                           | 0.952                        | 0.973                | 1                             | 1                             | NA                            | 0.984                         |
| <b>rs139298</b>    | 0.961                           | 0.952                        | 0.973                | 1                             | 1                             | NA                            | 0.984                         |
| <b>rs139300</b>    | NA                              | NA                           | NA                   | NA                            | NA                            | NA                            | NA                            |
| <b>rs139302</b>    | 0.922                           | 0.931                        | 0.934                | 0.984                         | 0.984                         | NA                            | 1                             |
|                    | <b>R<sup>2</sup></b>            | <b>R<sup>2</sup></b>         | <b>R<sup>2</sup></b> | <b>R<sup>2</sup></b>          | <b>R<sup>2</sup></b>          | <b>R<sup>2</sup></b>          | <b>R<sup>2</sup></b>          |
| <b>rs140936762</b> | 1                               | 0.543                        | 0.434                | 0.39                          | 0.382                         | NA                            | 0.372                         |
| <b>rs139293</b>    | 0.543                           | 1                            | 0.234                | 0.207                         | 0.203                         | NA                            | 0.206                         |
| rs139294           | 0.434                           | 0.234                        | 1                    | 0.91                          | 0.891                         | NA                            | 0.87                          |
| <b>rs139297</b>    | 0.39                            | 0.207                        | 0.91                 | 1                             | 0.98                          | NA                            | 0.933                         |
| <b>rs139298</b>    | 0.382                           | 0.203                        | 0.891                | 0.98                          | 1                             | NA                            | 0.914                         |
| <b>rs139300</b>    | NA                              | NA                           | NA                   | NA                            | NA                            | NA                            | NA                            |
| <b>rs139302</b>    | 0.372                           | 0.206                        | 0.87                 | 0.933                         | 0.914                         | NA                            | 1                             |

**Apobec 3H - LD Calculations  
1000G- AFR Group**

| RS_number          | <b>N15A</b><br><b>140936762</b> | <b>R18K</b><br><b>139293</b> | T43T<br>139294       | <b>G105R</b><br><b>139297</b> | <b>K121E</b><br><b>139298</b> | <b>K140E</b><br><b>139300</b> | <b>E178D</b><br><b>139302</b> |
|--------------------|---------------------------------|------------------------------|----------------------|-------------------------------|-------------------------------|-------------------------------|-------------------------------|
|                    | D'                              | D'                           | D'                   | D'                            | D'                            | D'                            | D'                            |
| <b>rs140936762</b> | 1                               | 1                            | 1                    | 1                             | 1                             | NA                            | 0.678                         |
| <b>rs139293</b>    | 1                               | 1                            | 1                    | 1                             | 1                             | NA                            | 1                             |
| rs139294           | 1                               | 1                            | 1                    | 0.993                         | 0.993                         | NA                            | 0.773                         |
| <b>rs139297</b>    | 1                               | 1                            | 0.993                | 1                             | 1                             | NA                            | 1                             |
| <b>rs139298</b>    | 1                               | 1                            | 0.993                | 1                             | 1                             | NA                            | 1                             |
| <b>rs139300</b>    | NA                              | NA                           | NA                   | NA                            | NA                            | NA                            | NA                            |
| <b>rs139302</b>    | 0.678                           | 1                            | 0.773                | 1                             | 1                             | NA                            | 1                             |
|                    | <b>R<sup>2</sup></b>            | <b>R<sup>2</sup></b>         | <b>R<sup>2</sup></b> | <b>R<sup>2</sup></b>          | <b>R<sup>2</sup></b>          | <b>R<sup>2</sup></b>          | <b>R<sup>2</sup></b>          |
| <b>rs140936762</b> | 1                               | 0.161                        | 0.092                | 0.063                         | 0.063                         | NA                            | 0.037                         |
| <b>rs139293</b>    | 0.161                           | 1                            | 0.015                | 0.01                          | 0.01                          | NA                            | 0.013                         |
| rs139294           | 0.092                           | 0.015                        | 1                    | 0.674                         | 0.674                         | NA                            | 0.517                         |
| <b>rs139297</b>    | 0.063                           | 0.01                         | 0.674                | 1                             | 1                             | NA                            | 0.791                         |
| <b>rs139298</b>    | 0.063                           | 0.01                         | 0.674                | 1                             | 1                             | NA                            | 0.791                         |
| <b>rs139300</b>    | NA                              | NA                           | NA                   | NA                            | NA                            | NA                            | NA                            |
| <b>rs139302</b>    | 0.037                           | 0.013                        | 0.517                | 0.791                         | 0.791                         | NA                            | 1                             |

NA= not calculated. Nonsynonymous SNPs are indicated in **BOLD** font.
