# Supplementary material for: Characterization of APOBEC3 variation in a population of HIV-1 infected individuals in northern South Africa
Source: Springer Nature journal article supplement (doi:10.1186/s12881-018-0740-4), 2019-01-19
Supplement: MOESM3 [file 16407458]

Table S3

**Apobec 3F - LD Calculations  
1000G- All Groups**

| RS_number   | R48P<br>35053197 | A78V<br>5750728 | Q87L<br>114704208 | I87L<br>146543452 | A108S<br>2020390 | R143R<br>4821862 | V231I<br>2076101 | E245E<br>113109079 | Y307C<br>12157816 | S327S<br>35895636 |
|-------------|------------------|-----------------|-------------------|-------------------|------------------|------------------|------------------|--------------------|-------------------|-------------------|
|             | D'               | D'              | D'                | D'                | D'               | D'               | D'               | D'                 | D'                | D'                |
| rs35053197  | 1                | 0.843           | 1                 | 1                 | 0.874            | 0.868            | 0.842            | 1                  | 1                 | 1                 |
| rs5750728   | 0.843            | 1               | 1                 | 0.75              | 0.989            | 0.994            | 0.997            | 1                  | 1                 | 1                 |
| rs114704208 | 1                | 1               | 1                 | 1                 | 1                | 1                | 1                | 1                  | 1                 | 1                 |
| rs146543452 | 1                | 0.75            | 1                 | 1                 | 1                | 0.579            | 0.748            | 1                  | 1                 | 1                 |
| rs2020390   | 0.874            | 0.989           | 1                 | 1                 | 1                | 0.839            | 0.996            | 1                  | 1                 | 1                 |
| rs4821862   | 0.868            | 0.994           | 1                 | 0.579             | 0.839            | 1                | 0.995            | 1                  | 0.07              | 1                 |
| rs2076101   | 0.842            | 0.997           | 1                 | 0.748             | 0.996            | 0.995            | 1                | 1                  | 1                 | 1                 |
| rs113109079 | 1                | 1               | 1                 | 1                 | 1                | 1                | 1                | 1                  | 1                 | 1                 |
| rs12157816  | 1                | 1               | 1                 | 1                 | 1                | 0.07             | 1                | 1                  | 1                 | 1                 |
| rs35895636  | 1                | 1               | 1                 | 1                 | 1                | 1                | 1                | 1                  | 1                 | 1                 |
|             | R <sup>2</sup>   | R <sup>2</sup>  | R <sup>2</sup>    | R <sup>2</sup>    | R <sup>2</sup>   | R <sup>2</sup>   | R <sup>2</sup>   | R <sup>2</sup>     | R <sup>2</sup>    | R <sup>2</sup>    |
| rs35053197  | 1                | 0.007           | 0                 | 0                 | 0.007            | 0.011            | 0.007            | 0                  | 0                 | 0                 |
| rs5750728   | 0.007            | 1               | 0.015             | 0.001             | 0.854            | 0.677            | 0.975            | 0.003              | 0.017             | 0.004             |
| rs114704208 | 0                | 0.015           | 1                 | 0                 | 0.018            | 0.022            | 0.015            | 0                  | 0                 | 0                 |
| rs146543452 | 0                | 0.001           | 0                 | 1                 | 0.001            | 0.001            | 0.001            | 0                  | 0                 | 0                 |
| rs2020390   | 0.007            | 0.854           | 0.018             | 0.001             | 1                | 0.552            | 0.85             | 0.003              | 0.019             | 0.005             |
| rs4821862   | 0.011            | 0.677           | 0.022             | 0.001             | 0.552            | 1                | 0.666            | 0.004              | 0                 | 0.003             |
| rs2076101   | 0.007            | 0.975           | 0.015             | 0.001             | 0.85             | 0.666            | 1                | 0.003              | 0.016             | 0.004             |
| rs113109079 | 0                | 0.003           | 0                 | 0                 | 0.003            | 0.004            | 0.003            | 1                  | 0                 | 0                 |
| rs12157816  | 0                | 0.017           | 0                 | 0                 | 0.019            | 0                | 0.016            | 0                  | 1                 | 0                 |
| rs35895636  | 0                | 0.004           | 0                 | 0                 | 0.005            | 0.003            | 0.004            | 0                  | 0                 | 1                 |

**Apobec 3F - LD Calculations  
1000G- AFR Group**

| RS_number   | R48P<br>35053197 | A78V<br>5750728 | Q87L<br>114704208 | I87L<br>146543452 | A108S<br>2020390 | R143R<br>4821862 | V231I<br>2076101 | E245E<br>113109079 | Y307C<br>12157816 | S327S<br>35895636 |
|-------------|------------------|-----------------|-------------------|-------------------|------------------|------------------|------------------|--------------------|-------------------|-------------------|
|             | D'               | D'              | D'                | D'                | D'               | D'               | D'               | D'                 | D'                | D'                |
| rs35053197  | 1                | 1               | 1                 | 1                 | 1                | 1                | 1                | 1                  | 1                 | 1                 |
| rs5750728   | 1                | 1               | 1                 | 0.381             | 0.956            | 0.984            | 0.995            | 1                  | 1                 | 1                 |
| rs114704208 | 1                | 1               | 1                 | 1                 | 1                | 1                | 1                | 1                  | 1                 | 1                 |
| rs146543452 | 1                | 0.381           | 1                 | 1                 | 1                | 0.542            | 0.331            | 1                  | 1                 | 1                 |
| rs2020390   | 1                | 0.956           | 1                 | 1                 | 1                | 0.157            | 0.994            | 1                  | 1                 | 1                 |
| rs4821862   | 1                | 0.984           | 1                 | 0.542             | 0.157            | 1                | 0.991            | 1                  | 1                 | 1                 |
| rs2076101   | 1                | 0.995           | 1                 | 0.331             | 0.994            | 0.991            | 1                | 1                  | 1                 | 1                 |
| rs113109079 | 1                | 1               | 1                 | 1                 | 1                | 1                | 1                | 1                  | 1                 | 1                 |
| rs12157816  | 1                | 1               | 1                 | 1                 | 1                | 1                | 1                | 1                  | 1                 | 1                 |
| rs35895636  | 1                | 1               | 1                 | 1                 | 1                | 1                | 1                | 1                  | 1                 | 1                 |
|             | R <sup>2</sup>   | R <sup>2</sup>  | R <sup>2</sup>    | R <sup>2</sup>    | R <sup>2</sup>   | R <sup>2</sup>   | R <sup>2</sup>   | R <sup>2</sup>     | R <sup>2</sup>    | R <sup>2</sup>    |
| rs35053197  | 1                | 0.008           | 0.002             | 0                 | 0.067            | 0.038            | 0.007            | 0                  | 0.001             | 0.001             |
| rs5750728   | 0.008            | 1               | 0.015             | 0                 | 0.483            | 0.204            | 0.899            | 0.003              | 0.009             | 0.004             |
| rs114704208 | 0.002            | 0.015           | 1                 | 0                 | 0.028            | 0.07             | 0.013            | 0.001              | 0.002             | 0.001             |
| rs146543452 | 0                | 0               | 0                 | 1                 | 0.013            | 0.002            | 0                | 0                  | 0                 | 0                 |
| rs2020390   | 0.067            | 0.483           | 0.028             | 0.013             | 1                | 0.01             | 0.474            | 0.022              | 0.017             | 0.008             |
| rs4821862   | 0.038            | 0.204           | 0.07              | 0.002             | 0.01             | 1                | 0.188            | 0.013              | 0.03              | 0.014             |
| rs2076101   | 0.007            | 0.899           | 0.013             | 0                 | 0.474            | 0.188            | 1                | 0.002              | 0.008             | 0.004             |
| rs113109079 | 0                | 0.003           | 0.001             | 0                 | 0.022            | 0.013            | 0.002            | 1                  | 0                 | 0                 |
| rs12157816  | 0.001            | 0.009           | 0.002             | 0                 | 0.017            | 0.03             | 0.008            | 0                  | 1                 | 0.001             |
| rs35895636  | 0.001            | 0.004           | 0.001             | 0                 | 0.008            | 0.014            | 0.004            | 0                  | 0.001             | 1                 |

The following RS number(s) were not found in dbSNP 142: Y196Y (rs765418322). Also no results were obtained for S118S (rs35928287), and S229S (rs549550231).
